# Supplementary material for: Serological Hendra Virus Diagnostics Using an Indirect ELISA-Based DIVA Approach with Recombinant Hendra G and N Proteins
Source: MDPI journal article supplement (doi:10.3390/microorganisms10061095), 2022-05-25

**Supplementary Figure S1: Prior and posterior diagnostic estimates for relative diagnostic sensitivity, diagnostic sensitivity for HeV-G and HeV-N assays using BLCM approach.**

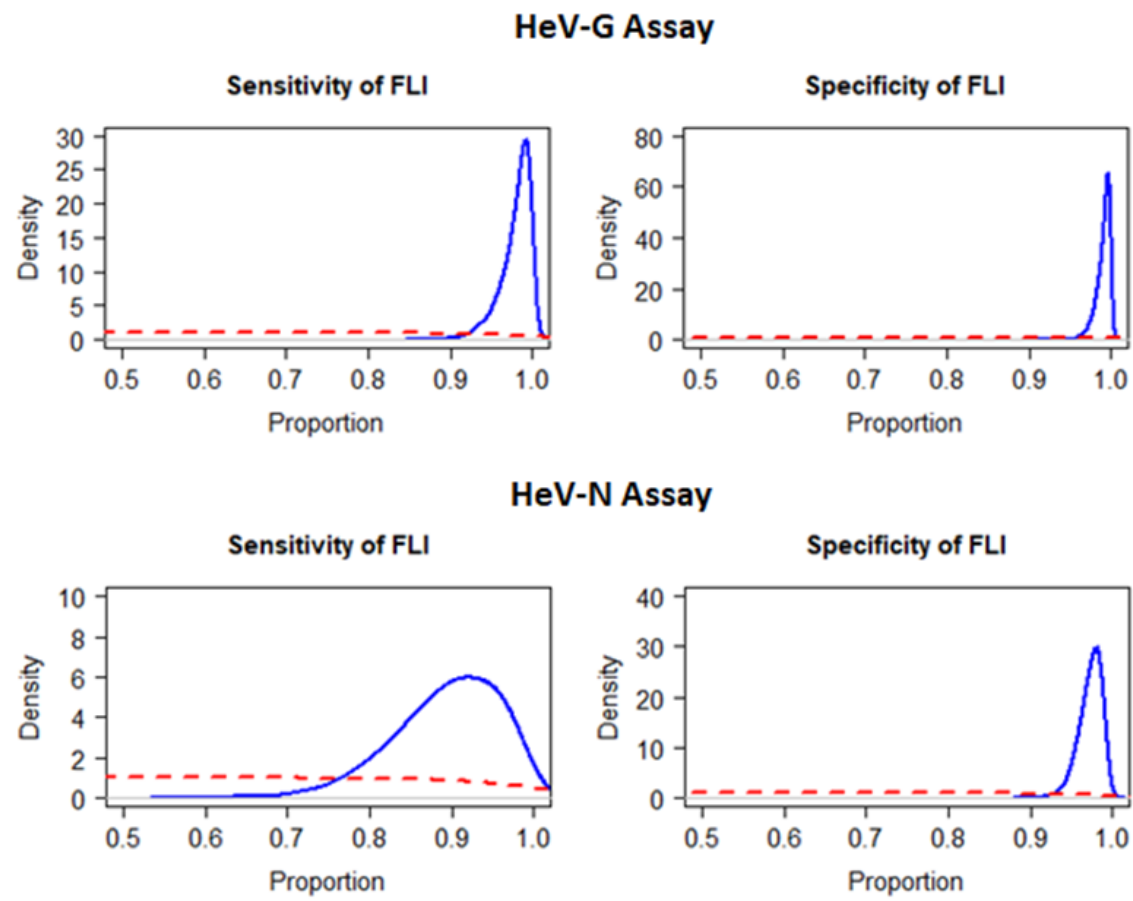

## Supplementary Figure S2: Analytical Sensitivity of HeV-G and HeV-N FLI-ELISA using Protein A/G as conjugate.

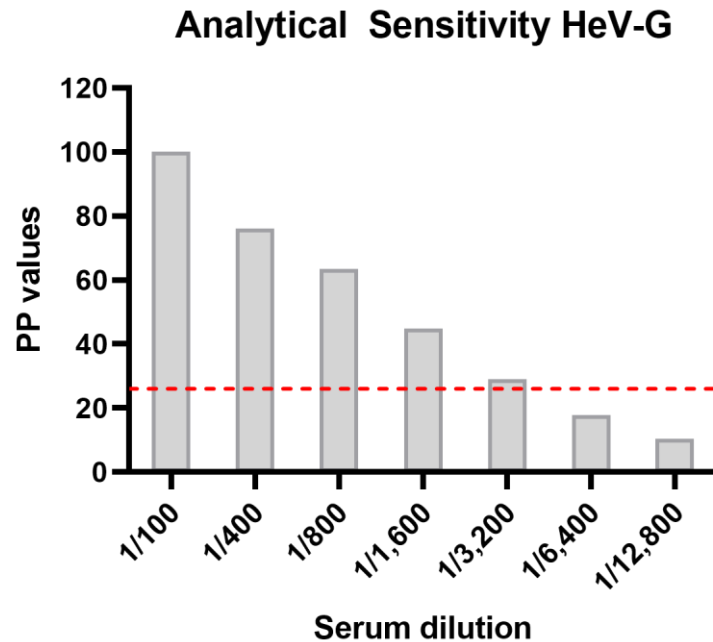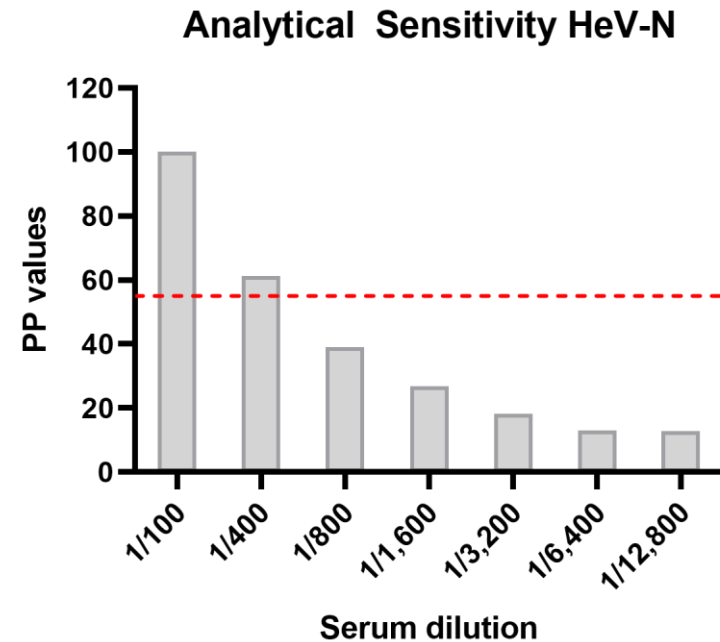

Supplement: s1 [file s1]
